1 **Title:** Role of the gut microbiome in frequent gut colonization with extended-spectrum  $\beta$ -  
2 lactamase-producing Enterobacterales among Peruvian children

3 **Running title:** Pediatric gut microbiome and ESBL susceptibility

4 **Authors:** Maya L. Nadimpalli<sup>1#</sup>, Neha Sehgal<sup>1</sup>, Luismarcelo Rojas-Salvatierra,<sup>2</sup> Robert H.  
5 Gilman<sup>2,3</sup>, Ashlee M. Earl<sup>4</sup>, Colin J. Worby<sup>4</sup>, Madison Schwab,<sup>5</sup> Amy J. Pickering<sup>6,7,8</sup>, Monica J.  
6 Pajuelo<sup>2,3#</sup>

7 **Author Information:** □

8 <sup>1</sup>Gangarosa Department of Environmental Health, Rollins School of Public Health, Emory  
9 University, Atlanta, GA, USA □

10 <sup>2</sup>Laboratorio de Microbiología Molecular, Laboratorios de Investigación y Desarrollo, Facultad  
11 de Ciencias e Ingeniería, Universidad Peruana Cayetano Heredia, Lima, Peru □

12 <sup>3</sup>Department of International Health, Johns Hopkins Bloomberg School of Public Health,  
13 Baltimore, Maryland, USA □

14 <sup>4</sup>Infectious Disease and Microbiome Program, The Broad Institute of MIT and Harvard,  
15 Cambridge, MA, USA □

16 <sup>5</sup>Program in Population Biology, Ecology, and Evolution, Emory University, Atlanta, GA, USA

17 <sup>6</sup>Department of Civil and Environmental Engineering, University of California, Berkeley, CA,  
18 USA □

19 <sup>7</sup>Blum Center for Developing Economies, University of California, Berkeley, CA, USA

20 <sup>8</sup>Chan Zuckerberg Biohub - San Francisco, CA, USA

21

22

23 **#Correspondence:** Maya L. Nadimpalli, Claudia Nance Rollins Room 6009, 1518 Clifton Rd  
24 NE, Atlanta GA 30322, USA. Email: [maya.l.nadimpalli@emory.edu](mailto:maya.l.nadimpalli@emory.edu)

25 Monica J. Pajuelo, Av. Honorio Delgado 430, San Martín de Porres 15102, Lima Peru. Email:  
26 [monica.pajuelo.t@upch.pe](mailto:monica.pajuelo.t@upch.pe)

27

28 **Abstract (150/150)**

29 We investigated whether differences in gut microbiome development could underlie differential  
30 susceptibility to gut colonization with extended-spectrum  $\beta$ -lactamase-producing  
31 Enterobacterales (ESBL-E) over time among children in peri-urban Lima. Weekly stool and daily  
32 surveys were collected from 345 children <3 years old during a 2016-19 study of enteric  
33 infections. A subset of children (n=12) were rarely gut-colonized with ESBL-E from 1-16 months  
34 of age. We performed short-read metagenomic sequencing of stool collected at 3, 6, 7, 9, 12,  
35 and 16 months from these children and a random subset of 42 frequently colonized children,  
36 and characterized differences in antibiotic use, sociodemographic characteristics, and the gut  
37 microbiome over time. No gut microbiome differences were identified, but rarely colonized  
38 children were more likely to live in households of lower socioeconomic status and consumed  
39 fewer antibiotics. Differences in exposures, rather than gut microbiome development, might  
40 underlie patterns of ESBL-E gut colonization among children in peri-urban Lima.

41

42 **Introduction (3497/3500 words)**

43 Antimicrobial-resistant (AMR) pathogens are a public health threat, particularly in low- and  
44 middle-income (LMIC) countries like Peru where the infectious disease burden remains high.  
45 Gut colonization with extended-spectrum  $\beta$ -lactamase-producing Enterobacterales (ESBL-E),  
46 which are resistant to 3<sup>rd</sup> generation cephalosporins, is common among children living in  
47 shantytowns of LMIC cities and is a risk factor for infections, particularly in healthcare  
48 settings.(1–5)

49 Previous studies in low-resource settings have sought to identify risk factors for  
50 children’s ESBL-E acquisition.(6–8) However, it remains unknown why some children are rarely  
51 or never colonized with ESBL-E, while others raised in the same settings are persistently gut-  
52 colonized. Intestinal “colonization resistance” refers to the ability of gut microbiota to inhibit  
53 colonization and overgrowth of exogenous bacteria.(9) Identifying microbial taxa that inhibit  
54 children’s gut colonization with ESBL-E over time, as well as early-life exposures that support  
55 the assembly and maintenance of these protective taxa, could be helpful in designing future  
56 interventions to protect children’s health.

57 Our team recently led a prospective birth cohort study of enteric infections among 345  
58 children living in a shantytown of peri-urban Lima. We previously used culture-based methods to  
59 characterize children’s gut colonization with ESBL-producing *Escherichia coli* and ESBL-  
60 producing *Klebsiella* spp., *Enterobacter* spp., and *Citrobacter* spp. (KEC) at or near 1, 3, 4, 5, 6,  
61 7, 9, 12, and 16 months of age for a subset of 112 children enrolled in the cohort study.(4) We  
62 noted that while most children were frequently gut-colonized with ESBL-E over time, a fraction  
63 (n=12) were rarely or never colonized. Here, we investigated whether differences in gut  
64 microbiome development could underlie differing patterns of susceptibility to ESBL-E gut-  
65 colonization among this population.

66

67 **Methods**

68 Stool collection

69 Stool samples were collected during a prospective cohort study of childhood enteric infections in  
70 Villa El Salvador, Lima, Peru (NIH R01A1108695-01A1).(4) Pregnant women were identified  
71 through an initial population screening in the community and through community health centers.  
72 Full-term babies were enrolled approximately within one month after birth from February 2016-  
73 May 2017, and daily surveillance data were collected through at least two years of age. Starting  
74 at recruitment and weekly thereafter, caregivers also kept a freshly soiled diaper for field worker  
75 collection. Upon arrival at a local lab facility, stool was aliquoted and stored at -20°C for up to  
76 48h, then transported to UPCH for long-term storage at -80°C.

77

78 Sample selection

79 As previously described,(4) Enterobacterales were cultured from weekly stool samples of all  
80 newborns enrolled after December 2016 (112/345). For each sample, Enterobacterales colonies  
81 were pooled then archived. Colonies collected at approximately 1, 3, 4, 5, 6, 7, 9, 12, and  
82 16□months of age were later screened for ESBL production. We observed two distinct patterns:  
83 children who were never or rarely colonized with ESBL-E (n=12), hereafter “*rarely colonized*,”  
84 and children who were often or always colonized (n=100), hereafter “*frequently colonized*”  
85 (**Figure S1**). Rarely colonized children first tested positive for ESBL-E at approximately 6  
86 months or later, and were colonized at fewer than half of tested timepoints. Frequently colonized  
87 children were colonized at more than half of timepoints.

88

89 Exposure assessment

90 As previously described,(4,10) socioeconomic variables were collected at recruitment and then  
91 once yearly. Additionally, field staff visited infants every day except Sunday to collect survey  
92 data from the previous 24 hours. If field workers were unable to visit an infants’ home (e.g., day

93 was Sunday), field workers collected survey data for the missing day at the next visit. At each  
94 daily visit, caretakers were asked about children's milk consumption, antibiotic use, and diarrhea  
95 in the past 24 hours. Caretakers were asked to provide medication packaging so trained field  
96 workers could confirm it was an antibiotic. Because survey data were collected daily, this  
97 packaging was typically available. A new antibiotic course began when caretakers reported  
98 antibiotic consumption following two days of no exposure; a course ended when the child did  
99 not consume antibiotics for two consecutive days. Children were considered to have had  
100 diarrhea if they experienced  $\geq 3$  liquid or semiliquid stools in the past 24 hours.

101

### 102 Metagenomic sequencing

103 We performed short-read metagenomic sequencing on available frozen stool specimens  
104 collected at approximately 3, 6, 7, 9, 12, and 16 months of age from all rarely colonized  
105 children (n=12 children, n=71 stool samples), and a randomly selected subset of 42 frequently  
106 colonized children (n=238 stool samples). Total DNA was extracted from approximately 0.25 g  
107 of frozen feces at UPCH using the QIAamp PowerFecal Pro DNA Kit (Qiagen) according to  
108 manufacturer's instructions and quantified using a Qubit 4 fluorometer (Invitrogen). Extraction  
109 blanks were included with each batch of extractions; DNA concentrations were below the Qubit  
110 level of detection ( $<0.1$  ng/ $\mu$ L) for all. DNA extracts were sent to the Broad Institute for short-  
111 read, paired-end 150 bp sequencing on an Illumina Novaseq 6000 System using SP4 flow cells  
112 to achieve 6 Gb per sample.

### 113 Processing metagenomic data and profiling taxonomy

114 Fastq sequences were trimmed and filtered to remove sequencing adaptors and low quality  
115 reads using bbmap.(11) We tabulated the number of raw reads for each sample and excluded  
116 from further analysis any sample with more or less reads than two standard deviations from the  
117 mean (n=11). Human contaminant sequences were removed from each sample by discarding  
118 reads that mapped to a non-redundant version of the Genome Reference Consortium Human

119 Build 38 (GRCh38; [www.ncbi.nlm.nih.gov](http://www.ncbi.nlm.nih.gov)) using Bowtie2 v2.5.1. Human sequence-filtered raw  
120 reads were deposited in the Sequence Read Archive (SRA; <https://www.ncbi.nlm.nih.gov/sra>)  
121 under the project number PRJNA1138246 (**Table S1**).

122 Taxonomic assignment of short reads was performed using MetaPhlan3 (with db  
123 v31).(12) Alpha diversity metrics were derived from the MetaPhlan3 relative abundance output  
124 using the vegan package in R [<https://cran.r-project.org/web/packages/vegan/>].

125

## 126 Data analysis

127 We examined differences in sociodemographic characteristics, diarrhea rates, and antibiotic use  
128 between rarely and frequently gut-colonized children using t-tests and chi square tests for all  
129 112 children for whom we characterized ESBL-E gut colonization, and separately for the 54  
130 children whose stool samples were sequenced.

131 For the subset of 54 children with fecal metagenomes, we examined whether any taxa  
132 were differentially abundant between rarely and frequently gut-colonized children across time  
133 using mixed effects linear regression models. An arcsine square root transformation was  
134 applied to relative abundance values. We also used mixed effects linear regression models to  
135 examine differences in log<sub>10</sub> transformed species richness values and Shannon diversity over  
136 time between groups. Transformed relative abundance values and alpha diversity metrics were  
137 modeled as a function of subject (random effects term), colonization pattern, i.e., rarely versus  
138 frequently colonized (binary fixed effects term), child age (continuous fixed effects term), and  
139 hours before diaper retrieval (continuous fixed effects term). We also ran additionally  
140 parametrized models adjusted for factors known to affect the gut microbiome, including child's  
141 delivery mode (binary fixed effects term) and number of diarrhea episodes and antibiotic  
142 courses in the past 30 days (continuous fixed effects terms), as well as all socioeconomic  
143 characteristics that differed groups with  $p < 0.20$ . We did not adjust for breastfeeding as there  
144 was minimal variation in this exposure over time (**Table S2**). All taxa with more than 10% non-

145 zero values were fitted using the nlme package in R. Significance of associations was  
146 determined using Wald's test, and p-values were adjusted for multiple hypothesis testing using  
147 the Benjamini-Hochberg correction at each taxonomic level.

148 For the subset of metagenomes for which we had matched ESBL-E gut colonization  
149 status, we examined whether any taxa were differentially abundant between timepoints where  
150 children were ESBL-E positive versus negative using mixed effects logistic regression models.  
151 For any given taxa detected in at least 10% of samples, we modeled ESBL-E positivity (yes/no)  
152 as a function of subject, child age, hours before diaper retrieval, number of recent diarrhea  
153 episodes and antibiotic courses, and the transformed relative abundance value of that taxa. We  
154 used the lme4 package in R and adjusted p-values using the Benjamini-Hochberg correction at  
155 each taxonomic level.

156 Finally, we used the StrainGE tool(13) to characterize *E. coli* strains in children's fecal  
157 metagenomes. A reference database was built using complete *E. coli* genomes from NCBI's  
158 RefSeq database (~3,100 genomes downloaded March 5, 2024), and each genome was  
159 assigned a Clermont phylotype using EzClermont v.0.70.(14)

160

## 161 Results

### 162 Children who were rarely gut-colonized with ESBL-E belonged to households of lower 163 socioeconomic status

164 There were no significant differences in exposures that are well-known to impact the gut  
165 microbiome, including rates of vaginal birth, antibiotic consumption rates, children's age at time  
166 of first antibiotic consumption, or numbers of diarrhea episodes per child month between rarely  
167 versus frequently colonized children (**Table 1**). Rarely colonized children did consume slightly  
168 fewer antibiotic courses overall (3.4 vs 4.5 courses/child-year,  $p=0.2$ ), and fewer azithromycin  
169 courses in particular (0.1 vs 0.5 courses/child-year,  $p=0.14$ ), but differences were not

170 statistically significant. Only 2/112 children did not consume any antibiotics, yet both were  
171 frequently colonized with ESBL-E.

172 Children who were rarely gut-colonized with ESBL-E did belong to households of lower  
173 socioeconomic status (SES). Specifically, they were somewhat more likely to live in households  
174 that relied on a public tap for drinking water ( $p=0.06$ ) versus having an indoor connection, and  
175 more likely to rely on pit latrines versus indoor flush toilets ( $p=0.05$ ). Most households that relied  
176 on water taps also used pit latrines, and vice versa. Rarely colonized children were also  
177 somewhat less likely to be born to a mother who had completed high school ( $p=0.11$ ).  
178 Children's antibiotic use (total courses/child-year) was weakly correlated with household  
179 reliance on public water taps ( $r_{pb}=0.24$ ,  $p<0.05$  by point-biserial correlation) and use of a pit  
180 latrine ( $r_{pb}=0.25$ ,  $p<0.05$ ), but was not correlated with maternal education attainment ( $r_{pb}=0.04$ ,  
181  $p=0.67$ ).

182 Breastfeeding was exceptionally common. On average, children received breastmilk  
183 nearly every day in the 30 days prior to a stool sample through 16 months of age (**Table S2**).  
184 Notably, nearly 1/3 children who were frequently colonized with ESBL-E regularly consumed  
185 formula early in life, compared to just 1 of 12 rarely colonized children (**Table 1**). However, this  
186 difference was not significant ( $p=0.29$ ).

187 The distributions of these exposures were similar among the subset of 54/112 children  
188 whose fecal metagenomes were sequenced for this study (**Table S3**).

189  
190 Peruvian children's gut microbiomes are dominated by *Bifidobacterium* spp. regardless of  
191 ESBL-E colonization status

192 Samples included in our final analysis included 66 fecal metagenomes from 12 rarely colonized  
193 children and 232 fecal metagenomes from 42 frequently colonized children ( $n=298$  total, 4-6  
194 samples per child).



195 As expected given the high proportion of breastfeeding in this setting, children's gut  
196 microbiomes were largely dominated by *Bifidobacterium* spp., comprising 58% of bacterial  
197 reads in average at 3 months, and 34% by 16 months (**Figure 1**). *B. longum* and *B. breve*  
198 predominated earlier in life, while *B. bifidum* consistently comprised between 10-15% of  
199 bacterial reads (**Figure 2**). The number of unique *Bifidobacterium* spp. in children's guts ranged  
200 from 0-9 (median=4) and increased as children aged ( $\beta=0.14$ ,  $SE=0.019$ ,  $p\text{-value}<0.0001$ ).  
201 Pooling all timepoints together, there was no difference in the relative abundance of any  
202 *Bifidobacterium* spp. between children who were rarely versus frequently gut-colonized with  
203 ESBL-E. Likewise, the number of unique *Bifidobacterium* spp. did not differ between groups.

204  
205 No differences in diversity or relative abundance of gut bacteria between rarely and frequently  
206 colonized children

207 Besides *Bifidobacterium*, other dominant bacterial genera included *Blautia* (average across all  
208 samples 3.1%), *Bacteroides* (2.1%), *Escherichia* (1.9%), *Lactobacillus* (1.1%), *Faecalibacterium*  
209 (0.9%), and *Klebsiella* (0.8%) (**Figure 1**). Potential enteropathogens like *Klebsiella pneumoniae*  
210 and *Enterococcus faecium* were detected among nearly all children (**Table S4**). After  
211 adjustment for multiple comparisons, no taxa were differentially abundant between children who  
212 were rarely versus frequently gut-colonized with ESBL-E over time in fully parameterized  
213 models (corrected p-values all > 0.89). Results were similar for simpler models that only  
214 adjusted for children's colonization pattern, child age, and hours before diaper retrieval (fdr-  
215 corrected p-values all >0.66).

216 Like others,(15) we found the number of unique bacterial species in children's fecal  
217 metagenomes increased as they aged, from 31 to 75, on average. The diversity of children's  
218 fecal metagenomes also increased (0.99 Shannon diversity index on average at 3 months, to  
219 2.31 at 16 months) (**Figure S4**). Pooling all timepoints together, we observed no differences in  
220 diversity or richness between groups ( $p\text{-values}> 0.62$ ). There were also no differences in

221 median richness or Shannon diversity at any specific sampling point ( $p>0.52$  for all pairwise  
222 differences by Wilcoxon rank sum tests).

223

224 No differences in the number and diversity of *E. coli* strains between rarely vs frequently  
225 colonized children

226 Rarely colonized children appeared to harbor slightly fewer *E. coli* strains on average at each  
227 timepoint (**Figure 3A**), but these differences were not statistically significant ( $p>0.15$  for all by  
228 Welch two-sample t-test). In general, children's stool samples were largely dominated by *E. coli*  
229 phylotypes A and B1 (**Figure 3B**). There was no significant difference in the proportion of  
230 strains belonging to any given *E. coli* phylotype between rarely and frequently colonized children  
231 at any time point ( $p>0.26$  for all pairwise comparisons by Fisher test).

232 We also examined differences in *E. coli* strains between sampling points where children  
233 were gut-colonized with ESBL-E versus not (ESBL-E gut colonization status available for  
234 263/298 fecal metagenomes). Overall, children harbored more unique *E. coli* strains at sampling  
235 points where they were gut-colonized with ESBL-E (mean=2.3 across all age groups) versus  
236 sampling points where they were not (mean=2.1,  $p=0.05$  by Welch two-sample t-test), though  
237 there were no differences for specific sampling points ( $p>0.15$  for all by Welch two-sample t-  
238 test). Overall, there was no difference in *E. coli* phylotype distribution at sampling points where  
239 children were gut-colonized with ESBL-E versus not ( $p=0.75$  by Fisher test).

240

241 Some differences in relative abundance of specific taxa at ESBL-E positive versus negative  
242 timepoints

243 Regardless of whether children were rarely or frequently gut-colonized with ESBL-E over time,  
244 we did note that the relative abundances of the phyla *Actinobacteria* (average across all  
245 samples 45.9%;  $\text{fdr-corrected } p\text{-value}=0.20$ ) and the genus *Slackia* (0.006%,  $\text{fdr-corrected } p\text{-}$   
246  $\text{val}=0.03$ ) in children's stool were higher at timepoints where children were not gut-colonized

247 with ESBL-E by culture, when controlling for child age, hours before diaper retrieval, number of  
248 recent antibiotic courses and diarrhea episodes, and repeated measurements (**Figure S3**).  
249 Relative abundances of the phyla *Proteobacteria* (3.4%, fdr-corrected p-value=0.20), the phyla  
250 *Bacteroidetes* (2.9%, fdr-corrected p-value=0.20), and the class *Erysipelotrichia* (0.47%; fdr-  
251 corrected p-val=0.15) were higher at timepoints where children colonized with ESBL-E by  
252 culture.

253

## 254 Discussion

255 This is the first longitudinal study of the gut microbiome among South American children. As  
256 previously reported, gut colonization with ESBL-E was prevalent among children in this peri-  
257 urban setting and steadily increased as children aged.(4) Similar to recent studies among  
258 healthy adults,(16–18) our findings suggest that differences in exposures, rather than  
259 differences in gut microbiome development, might underlie patterns of ESBL gut colonization  
260 over time among children in peri-urban Lima. To our knowledge, this is the first study to  
261 examine this research question among young children who are living in a low-resource setting  
262 and whose gut microbiomes are rapidly developing.

263 Three recent Western studies and two LMIC studies have investigated associations  
264 between gut microbial taxa and ESBL-E gut colonization at single time points.(16–20) Two  
265 case-control studies among Dutch(17) and French adults(18) found no differences in alpha  
266 diversity or taxa abundance between healthy adults who were gut-colonized with ESBL-E  
267 versus not, after controlling for age, sex, ethnicity, and recent travel. Another study among US  
268 travelers(16) found no difference in the pre-travel gut microbiomes of individuals who acquired  
269 ESBL-E while abroad versus those who did not, suggesting that differences in exposures while  
270 traveling, rather than inherent differences in intestinal colonization resistance, are more  
271 important determinants of ESBL-E acquisition. One study of healthy Thai adults(20) reported  
272 differences in gut taxa between ESBL-E carriers and non-carriers, but because potential

273 confounders were not controlled for, it is challenging to attribute differences to ESBL-E  
274 colonization status. A small study among indigenous persons in French Guyana identified some  
275 differences in gut microbial taxa between 8 cases and 24 controls, but whether these  
276 differences preceded or were a result of ESBL-E gut colonization could not be determined.(19)  
277 To our knowledge, no previous study has examined whether differences in the gut microbiome  
278 over time, rather than just at a single timepoint, may underlie ESBL-E gut colonization patterns.  
279 Our study adds to the existing literature by indicating that patterns of rare versus frequent  
280 ESBL-E gut colonization among children who are frequently exposed to enteropathogens and  
281 antibiotics may not primarily be a function of intestinal colonization resistance.

282 Taxa that previous studies have identified to be associated with ESBL carriage or non-  
283 carriage differed from what we observed. *Actinobacteria*, which typically dominate the guts of  
284 breastfeeding children,(21) were somewhat more abundant at ESBL-negative timepoints (fdr-  
285 corrected p-val=0.2), while *Proteobacteria*, *Bacteroidetes*, and *Erysipelotrichia*, all of which are  
286 commonly isolated in children's stool,(21) were somewhat more abundant at ESBL-positive  
287 timepoints (p-val between 0.15 and 0.2 for all). *Slackia*, which is not well-described among  
288 children but has previously been isolated from both gut and oral infections in adults,(22) was  
289 more abundant at ESBL-negative timepoints though overall abundance was low (0.006%).  
290 Differences between our study and previous work(19,20) could be a result of our focus on the  
291 pediatric microbiome, differences in our sequencing approach, differences in environmental  
292 exposures, or other factors. We note that whether these differentially abundant taxa preceded or  
293 followed ESBL-E gut colonization cannot be distinguished through our analytical approach.

294 Overall, the fact that we did not identify gut taxa that were differentially abundant  
295 between rarely and frequently colonized children could be because such differences do not  
296 exist; for example, perhaps the differential exposures we noted only affected the gut  
297 metabolome. There are other gut microbiome differences that we were unable to explore, e.g.,  
298 higher bacteriocin production among commensal strains harbored by rarely colonized children,

299 which could favor the exclusion of ESBL-E.(23) Or, we may have been underpowered to detect  
300 differences. Given the high and increasing rates of ESBL-E gut colonization in community  
301 settings in LMICs, we note that enrolling sufficient children to adequately investigate this  
302 research question may be challenging in future studies.

303 While we did not identify differentially abundant gut taxa or differences in *E. coli* strains  
304 between rarely and frequently colonized children, we surprisingly found that rarely colonized  
305 children were more likely to belong to households of lower SES. Although these differences  
306 were not statistically significant at the  $p < 0.05$  level, the households of rarely colonized children  
307 were somewhat more likely to lack access to indoor piped water and flush toilets, and their  
308 mothers were less likely to have completed high school. A previous study of drug-resistant  
309 urinary tract infections in women in Hyderabad, India, found that poorer women were most likely  
310 to have an ESBL-producing infection, despite consuming fewer antibiotics than wealthier  
311 women, suggesting environmental exposures unique to low SES populations might be  
312 underlying elevated risks of exposure to AMR bacteria in this setting.(24) We find the opposite  
313 trend here, with lower SES children having the lowest risk of being persistently colonized with  
314 ESBL-E early in life. The role of the environment as a source of exposure to ESBL-E likely  
315 differs among and perhaps within LMICs. We note that while multiple global analyses indicate  
316 that antimicrobial resistance is more common in LMICs compared to high-income  
317 settings,(25,26) many LMICs have high rates of income inequality and within-country  
318 heterogeneity in acquisition risks have rarely been examined.(27)

319 This study had strengths and limitations. Our study represents the first longitudinal  
320 analysis of the gut microbiome of South American children, whose fecal metagenomes are  
321 under-represented in global databases.(28) Because daily surveys were collected, we were able  
322 to control for time-varying exposures that are known to affect the gut microbiome, including  
323 antibiotic use and recent diarrhea, with a low risk of recall bias. However, our study was  
324 relatively small, and we may have been underpowered to detect differences in gut microbial

325 taxa between groups. Further, as previously noted,(4) we used culture-based methods with a  
326 relatively high lower limit of detection (~2 log<sub>10</sub> CFU/g wet feces) to identify ESBL-E gut  
327 colonization for this study. Rarely colonized children may have been gut-colonized with ESBL-E  
328 at timepoints where they tested negative, just at concentrations below the limit of detection.  
329 However, since higher concentrations of multidrug-resistant Enterobacterales in the gut are  
330 associated with elevated risks of infection,(29,30) identifying whether specific gut taxa may  
331 suppress the growth of ESBL-E remains a clinically relevant question.

332

### 333 Conclusion

334 This study examined whether differences in Peruvian children's gut microbiome development  
335 could underpin differences in early-life susceptibility to ESBL-E gut colonization. We did not  
336 identify any significant differences in species richness, Shannon diversity, *E. coli* strain diversity,  
337 or the relative abundance of specific taxa between rarely versus frequently colonized children.  
338 Nevertheless, rarely colonized children who were somewhat more likely to live in households of  
339 lower SES. Regardless of gut colonization patterns over time, children harbored higher relative  
340 abundances of *Proteobacteria*, *Bacteroidetes*, and *Erysipelotrichia* at timepoints where they  
341 were ESBL-E positive and higher abundances of *Actinobacteria* and *Slackia* at timepoints where  
342 they were negative. Our findings are in line with recent studies among healthy adults(16–18)  
343 suggesting that differences in exposures, rather than differences in the gut microbiome, might  
344 underlie differing patterns of susceptibility to ESBL-E gut-colonization. Our findings suggest that  
345 preventing ESBL-E colonization among children in LMICs may require reducing their exposures  
346 to environmental reservoirs of ESBL-E.

347

### 348 Funding

349 This work was supported by NIH R01AI108695-01A, NIH award KL2TR002545, and NIH award  
350 U19AI110818. MLN was supported by Emory University and the MP3 Initiative. NS was

351 supported by NIH award 5T32ES012870. The content is solely the responsibility of the authors  
352 and does not necessarily represent the official views of Emory University or the MP3 Initiative.

353

#### 354 Acknowledgements

355 We thank all field workers and the community of Villa El Salvador for their collaboration in the  
356 parent study.

357

#### 358 Conflicts of interest

359 None to declare.

360

#### 361 Data Availability

362 Children's fecal metagenomes are available in NCBI's Sequence Read Archive

363 (<https://www.ncbi.nlm.nih.gov/sra>) under BioProject number PRJNA1138246.

364

#### 365 Ethics approval and consent to participate

366 The parent cohort study was approved by the Institutional Review Boards of Asociación

367 Benefica PRISMA, Universidad Peruana Cayetano Heredia, and Johns Hopkins University.

368 Written informed consent was obtained from caretakers of the infants for both study participation

369 and the use of collected specimens for subsequent research. The analysis of stool specimens

370 for this substudy was approved by the Institutional Review Boards of Asociación Benefica

371 PRISMA and Universidad Peruana Cayetano Heredia (no. 201592). Metagenomic sequencing

372 of stool specimens was determined to be exempt by the Tufts University Health Sciences IRB

373 (STUDY00001328).

374

375

376 References

- 377 1. Cheikh A, Belefquih B, Chajai Y, Cheikhaoui Y, El Hassani A, Benouda A.  
378 Enterobacteriaceae producing extended-spectrum  $\beta$ -lactamases (ESBLs) colonization as a  
379 risk factor for developing ESBL infections in pediatric cardiac surgery patients:  
380 “retrospective cohort study.” *BMC Infect Dis.* 2017 29;17(1):237.
- 381 2. Ben-Ami R, Schwaber MJ, Navon-Venezia S, Schwartz D, Giladi M, Chmelnitsky I, et al.  
382 Influx of extended-spectrum beta-lactamase-producing enterobacteriaceae into the hospital.  
383 *Clin Infect Dis.* 2006 Apr 1;42(7):925–34.
- 384 3. Denis B, Lafaurie M, Donay JL, Fontaine JP, Oksenhendler E, Raffoux E, et al. Prevalence,  
385 risk factors, and impact on clinical outcome of extended-spectrum beta-lactamase-  
386 producing *Escherichia coli* bacteraemia: a five-year study. *Int J Infect Dis.* 2015 Oct;39:1–6.
- 387 4. Nadimpalli ML, Rojas Salvatierra L, Chakraborty S, Swarouth JM, Cabrera LZ, Pickering AJ,  
388 et al. Effects of breastfeeding on children’s gut colonization with multidrug-resistant  
389 Enterobacteriales in peri-urban Lima, Peru. *Gut Microbes.*
- 390 5. Nadimpalli ML, Marks SJ, Montealegre MC, Gilman RH, Pajuelo MJ, Saito M, et al. Urban  
391 informal settlements as hotspots of antimicrobial resistance and the need to curb  
392 environmental transmission. *Nature Microbiology.* 2020 Jun 1;5(6):787–95.
- 393 6. Kothari C, Gaiind R, Singh LC, Sinha A, Kumari V, Arya S, et al. Community acquisition of  $\beta$ -  
394 lactamase producing Enterobacteriaceae in neonatal gut. *BMC Microbiol.* 2013 Jun  
395 17;13:136.
- 396 7. Islam MA, Amin MB, Roy S, Asaduzzaman M, Islam MR, Navab-Daneshmand T, et al. Fecal  
397 colonization with multidrug-resistant *E. coli* among healthy infants in rural Bangladesh.  
398 *Frontiers in Microbiology.* 2019;10:640.
- 399 8. Tellevik MG, Blomberg B, Kommedal Ø, Maselle SY, Langeland N, Moyo SJ. High  
400 Prevalence of Faecal Carriage of ESBL-Producing Enterobacteriaceae among Children in  
401 Dar es Salaam, Tanzania. *PLOS ONE.* 2016 Dec;11(12):e0168024.
- 402 9. Lawley TD, Walker AW. Intestinal colonization resistance. *Immunology.* 2013 Jan;138(1):1–  
403 11.
- 404 10. Pajuelo MJ, Noazin S, Cabrera L, Toledo A, Velagic M, Arias L, et al. Epidemiology of  
405 enterotoxigenic *Escherichia coli* and impact on the growth of children in the first two years of  
406 life in Lima, Peru. *Front Public Health.* 2024;12:1332319.
- 407 11. Brian Bushnell. BBMap [Internet]. Available from: <https://sourceforge.net/projects/bbmap/>
- 408 12. Truong DT, Tett A, Pasolli E, Huttenhower C, Segata N. Microbial strain-level population  
409 structure and genetic diversity from metagenomes. *Genome Res.* 2017;27(4):626–38.
- 410 13. Van Dijk LR, Walker BJ, Straub TJ, Worby CJ, Grote A, Schreiber HL, et al. StrainGE: a  
411 toolkit to track and characterize low-abundance strains in complex microbial communities.  
412 *Genome Biol.* 2022 Dec;23(1):74.



- 413 14. Waters NR, Abram F, Brennan F, Holmes A, Pritchard L. Easy phylotyping of *Escherichia*  
414 *coli* via the EzClermont web app and command-line tool. *Access Microbiol.*  
415 2020;2(9):acmi000143.
- 416 15. Stewart CJ, Ajami NJ, O'Brien JL, Hutchinson DS, Smith DP, Wong MC, et al. Temporal  
417 development of the gut microbiome in early childhood from the TEDDY study. *Nature.*  
418 2018;562(7728):583–8.
- 419 16. Worby CJ, Sridhar S, Turbett SE, Becker MV, Kogut L, Sanchez V, et al. Gut microbiome  
420 perturbation, antibiotic resistance, and *Escherichia coli* strain dynamics associated with  
421 international travel: a metagenomic analysis. *The Lancet Microbe* [Internet]. 2023 Sep 13  
422 [cited 2023 Sep 29];0(0). Available from:  
423 [https://www.thelancet.com/journals/lanmic/article/PIIS2666-5247\(23\)00147-7/fulltext](https://www.thelancet.com/journals/lanmic/article/PIIS2666-5247(23)00147-7/fulltext)
- 424 17. Ducarmon QR, Zwitter RD, Willems RPJ, Verhoeven A, Nooij S, van der Klis FRM, et al.  
425 Gut colonisation by extended-spectrum  $\beta$ -lactamase-producing *Escherichia coli* and its  
426 association with the gut microbiome and metabolome in Dutch adults: a matched case-  
427 control study. *Lancet Microbe.* 2022 Jun;3(6):e443–51.
- 428 18. Boyd A, El Dani M, Ajrouche R, Demontant V, Cheval J, Lacombe K, et al. Gut microbiome  
429 diversity and composition in individuals with and without extended-spectrum  $\beta$ -lactamase-  
430 producing *Enterobacteriales* carriage: a matched case–control study in infectious diseases  
431 department. *Clinical Microbiology and Infection* [Internet]. 2024 Mar 23 [cited 2024 Jul 17];  
432 Available from: <https://www.sciencedirect.com/science/article/pii/S1198743X24001460>
- 433 19. Gosalbes MJ, Vázquez-Castellanos JF, Angebault C, Woerther PL, Ruppé E, Ferrús ML, et  
434 al. Carriage of *Enterobacteria* Producing Extended-Spectrum  $\beta$ -Lactamases and  
435 Composition of the Gut Microbiota in an Amerindian Community. *Antimicrob Agents*  
436 *Chemother.* 2016 Jan;60(1):507–14.
- 437 20. Piewngam P, Quiñones M, Thirakittiwatthana W, Yungyuen T, Otto M, Kiratisin P.  
438 Composition of the intestinal microbiota in extended-spectrum  $\beta$ -lactamase-producing  
439 *Enterobacteriaceae* carriers and non-carriers in Thailand. *Int J Antimicrob Agents.* 2019  
440 Apr;53(4):435–41.
- 441 21. Milani C, Duranti S, Bottacini F, Casey E, Turrone F, Mahony J, et al. The First Microbial  
442 Colonizers of the Human Gut: Composition, Activities, and Health Implications of the Infant  
443 Gut Microbiota. *Microbiology and Molecular Biology Reviews.* 2017 Nov  
444 8;81(4):10.1128/mnbr.00036-17.
- 445 22. Kim KS, Rowlinson MC, Bennion R, Liu C, Talan D, Summanen P, et al. Characterization of  
446 *Slackia exigua* isolated from human wound infections, including abscesses of intestinal  
447 origin. *J Clin Microbiol.* 2010 Apr;48(4):1070–5.
- 448 23. Majeed H, Gillor O, Kerr B, Riley MA. Competitive interactions in *Escherichia coli*  
449 populations: the role of bacteriocins. *ISME J.* 2011 Jan;5(1):71–81.
- 450 24. Alsan M, Kammili N, Lakshmi J, Xing A, Khan A, Rani M, et al. Poverty and Community-  
451 Acquired Antimicrobial Resistance with Extended-Spectrum  $\beta$ -Lactamase-Producing  
452 Organisms, Hyderabad, India. *Emerging Infect Dis.* 2018;24(8):1490–6.

- 453 25. Antimicrobial Resistance Collaborators. Global burden of bacterial antimicrobial resistance  
454 in 2019: a systematic analysis. *Lancet*. 2022 Feb 12;399(10325):629–55.
- 455 26. Hendriksen RS, Munk P, Njage P, van Bunnik B, McNally L, Lukjancenko O, et al. Global  
456 monitoring of antimicrobial resistance based on metagenomics analyses of urban sewage.  
457 *Nature Communications*. 2019 Mar 8;10(1):1124.
- 458 27. Blackmon S, Avendano E, Nirmala N, Chan CW, Morin RA, Balaji S, et al. Socioeconomic  
459 status and the risk for colonization or infection with priority bacterial pathogens: a global  
460 evidence map [Internet]. 2024 [cited 2024 Jun 5]. Available from:  
461 <http://medrxiv.org/lookup/doi/10.1101/2024.04.24.24306293>
- 462 28. Fuhrmeister ER, Harvey AP, Nadimpalli ML, Gallandat K, Ambelu A, Arnold BF, et al.  
463 Evaluating the relationship between community water and sanitation access and the global  
464 burden of antibiotic resistance: an ecological study. *The Lancet Microbe*. 2023 Aug  
465 1;4(8):e591–600.
- 466 29. Ruppé E, Lixandru B, Cojocaru R, Büke C, Paramythiotou E, Angebault C, et al. Relative  
467 fecal abundance of extended-spectrum- $\beta$ -lactamase-producing *Escherichia coli* strains and  
468 their occurrence in urinary tract infections in women. *Antimicrob Agents Chemother*. 2013  
469 Sep;57(9):4512–7.
- 470 30. Shimasaki T, Seekatz A, Bassis C, Rhee Y, Yelin RD, Fogg L, et al. Increased Relative  
471 Abundance of *Klebsiella pneumoniae* Carbapenemase-producing *Klebsiella pneumoniae*  
472 Within the Gut Microbiota Is Associated With Risk of Bloodstream Infection in Long-term  
473 Acute Care Hospital Patients. *Clin Infect Dis*. 2019 May 30;68(12):2053–9.
- 474

475 Tables

476 **Table 1.** Sociodemographic characteristics and early-life exposures among 112 Peruvian  
477 children who were rarely or frequently colonized with ESBL-E during the first 16 months of life.

|                                                                 | Frequently colonized (n=100) | Rarely colonized (n=12) | p-val |
|-----------------------------------------------------------------|------------------------------|-------------------------|-------|
| Male (n, %)                                                     | 48 (48.0)                    | 7 (58.3)                | 0.711 |
| Birth mode (n, %)                                               |                              |                         | 0.234 |
| Vaginal                                                         | 68 (68.0)                    | 10 (83.3)               |       |
| Cesarean section                                                | 31 (31.0)                    | 1 (8.3)                 |       |
| Missing                                                         | 1 (1.0)                      | 1 (8.3)                 |       |
| Mother completed high school (n, %)                             | 69 (69.0)                    | 5 (41.7)                | 0.117 |
| Water Source (n,%)                                              |                              |                         | 0.063 |
| Other                                                           | 5 (5.0)                      | 0 (0.0)                 |       |
| Public Tap                                                      | 15 (15.0)                    | 5 (41.7)                |       |
| Indoor water connection (24 hours)                              | 80 (80.0)                    | 7 (58.3)                |       |
| Toilet (n,%)                                                    |                              |                         | 0.051 |
| Other                                                           | 2 (2.0)                      | 0 (0.0)                 |       |
| Pit latrine                                                     | 14 (14.0)                    | 5 (41.7)                |       |
| Indoor flush toilet                                             | 84 (84.0)                    | 7 (58.3)                |       |
| Home has improved flooring <sup>a</sup>                         | 97 (97.0)                    | 11 (91.7)               | 0.906 |
| Lives in household with more than six household members (n,%)   | 40 (40.0)                    | 2 (16.7)                | 0.207 |
| Received breastmilk 90% of days in first 3 months (n,%)         | 63 (63.0)                    | 8 (66.7)                | 1     |
| Received formula 50% of days in first 3 months (n,%)            | 27 (27.0)                    | 1 (8.3)                 | 0.29  |
| Household owned chickens (n,%)                                  | 17 (17.0)                    | 1 (8.3)                 | 0.721 |
| Total number of antibiotic courses per child-year (mean (SD))   | 4.45 (2.86)                  | 3.36 (2.29)             | 0.207 |
| Number of azithromycin courses per child-year (mean (SD))       | 0.47 (0.95)                  | 0.06 (0.22)             | 0.144 |
| Number of sulfa-trimethoprim courses per child-year (mean (SD)) | 1.03 (1.15)                  | 0.98 (1.09)             | 0.888 |
| Number of amoxicillin courses per child-year (mean (SD))        | 1.59 (1.41)                  | 1.93 (2.36)             | 0.471 |
| Number of cefalexin courses per child-year (mean (SD))          | 0.53 (0.90)                  | 0.32 (0.61)             | 0.425 |
| Age in months at time of first antibiotic use (mean (SD))       | 5.67 (4.49)                  | 7.23 (3.75)             | 0.251 |
| Number of diarrhea episodes/100-child-month (mean (SD))         | 6.88 (5.09)                  | 5.28 (2.59)             | 0.288 |

478 <sup>a</sup>Improved flooring included cement, wood, tiles, and “falso piso.” Unimproved flooring included  
479 dirt and sand.

480

481 Figures

482

483 **Figure 1.** Proportion of bacterial genera with at least 1% average relative abundance in stool

484 samples collected from Peruvian children aged 3-16 months.

485

486 **Figure 2.** Relative abundance of dominant *Bifidobacterium spp.* in stool samples collected from

487 Peruvian children aged 3-16 months.

488 Note: Fifteen *Bifidobacterium spp.* were detected among all children; species with at least 1%

489 average relative abundance are depicted here.

490

491 **Figure 3.** Distribution of *E. coli* strains in stool samples from Peruvian children aged 3-16

492 months who were frequently vs rarely gut-colonized with ESBL-E, including A) mean number of

493 unique *E. coli* strains, and B) Clermont phylotype.

494

495

496

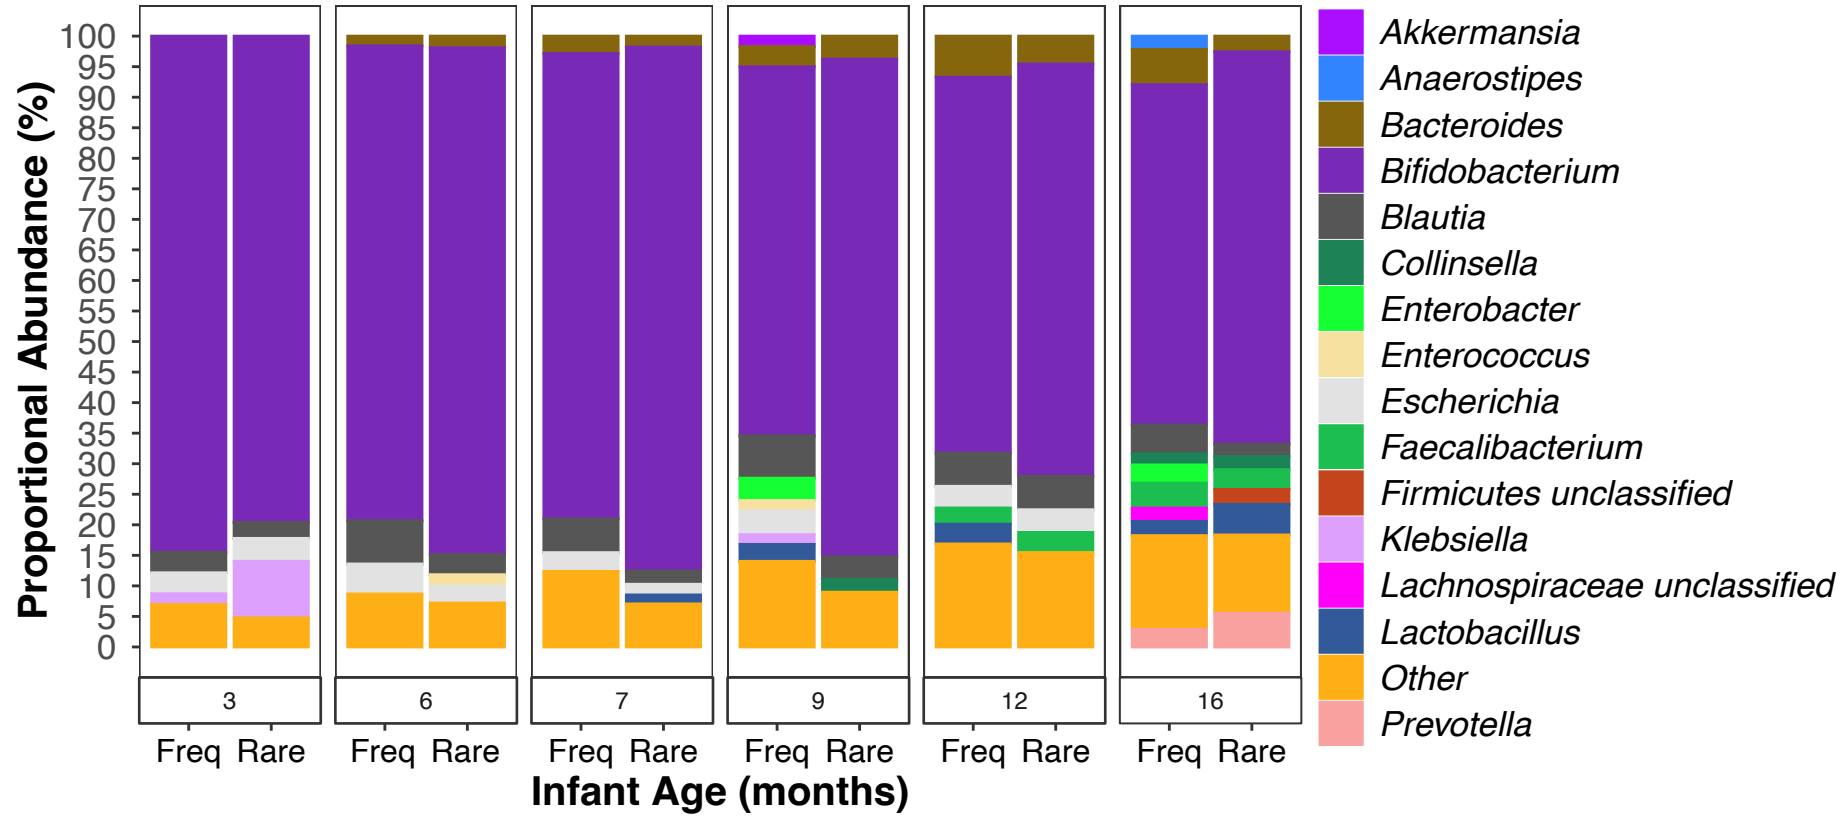

Proportional Abundance (%)

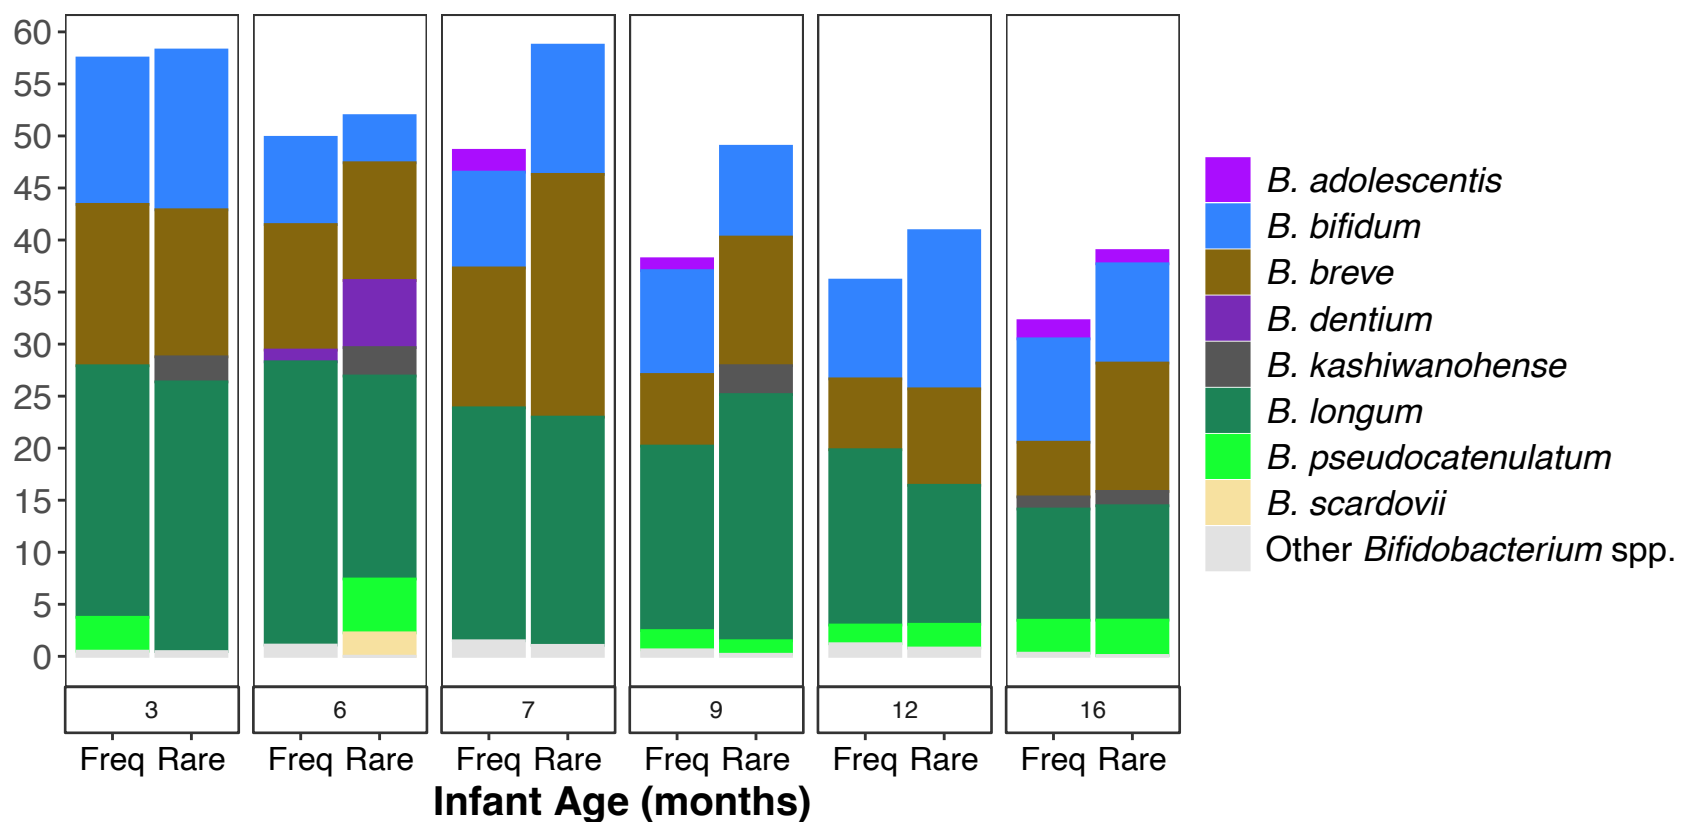

A)

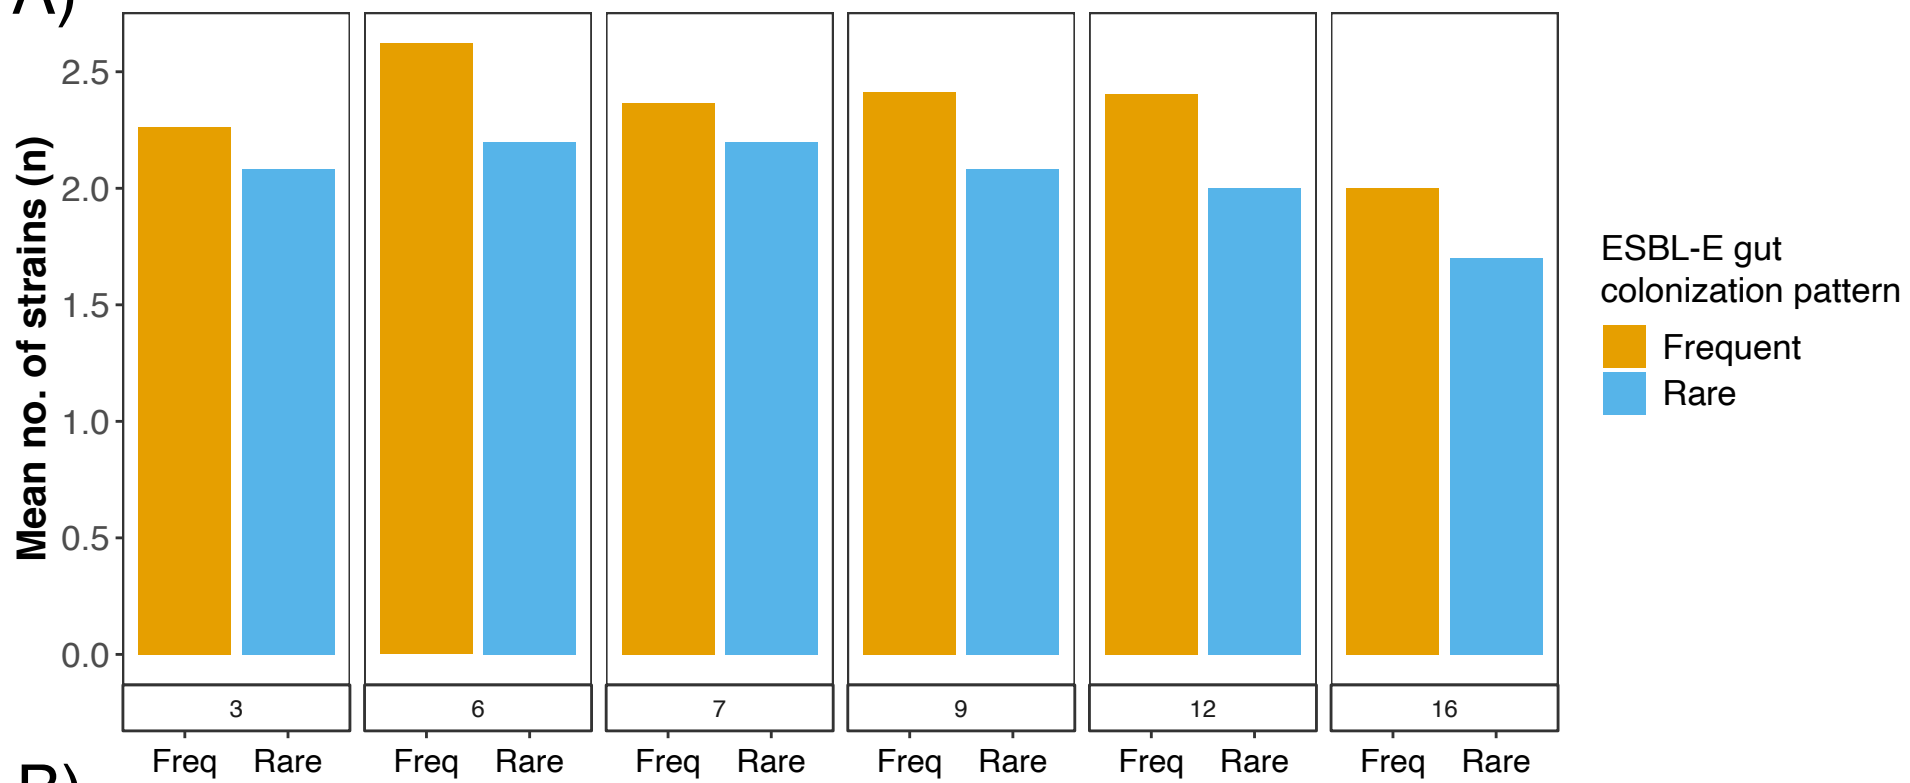

B)

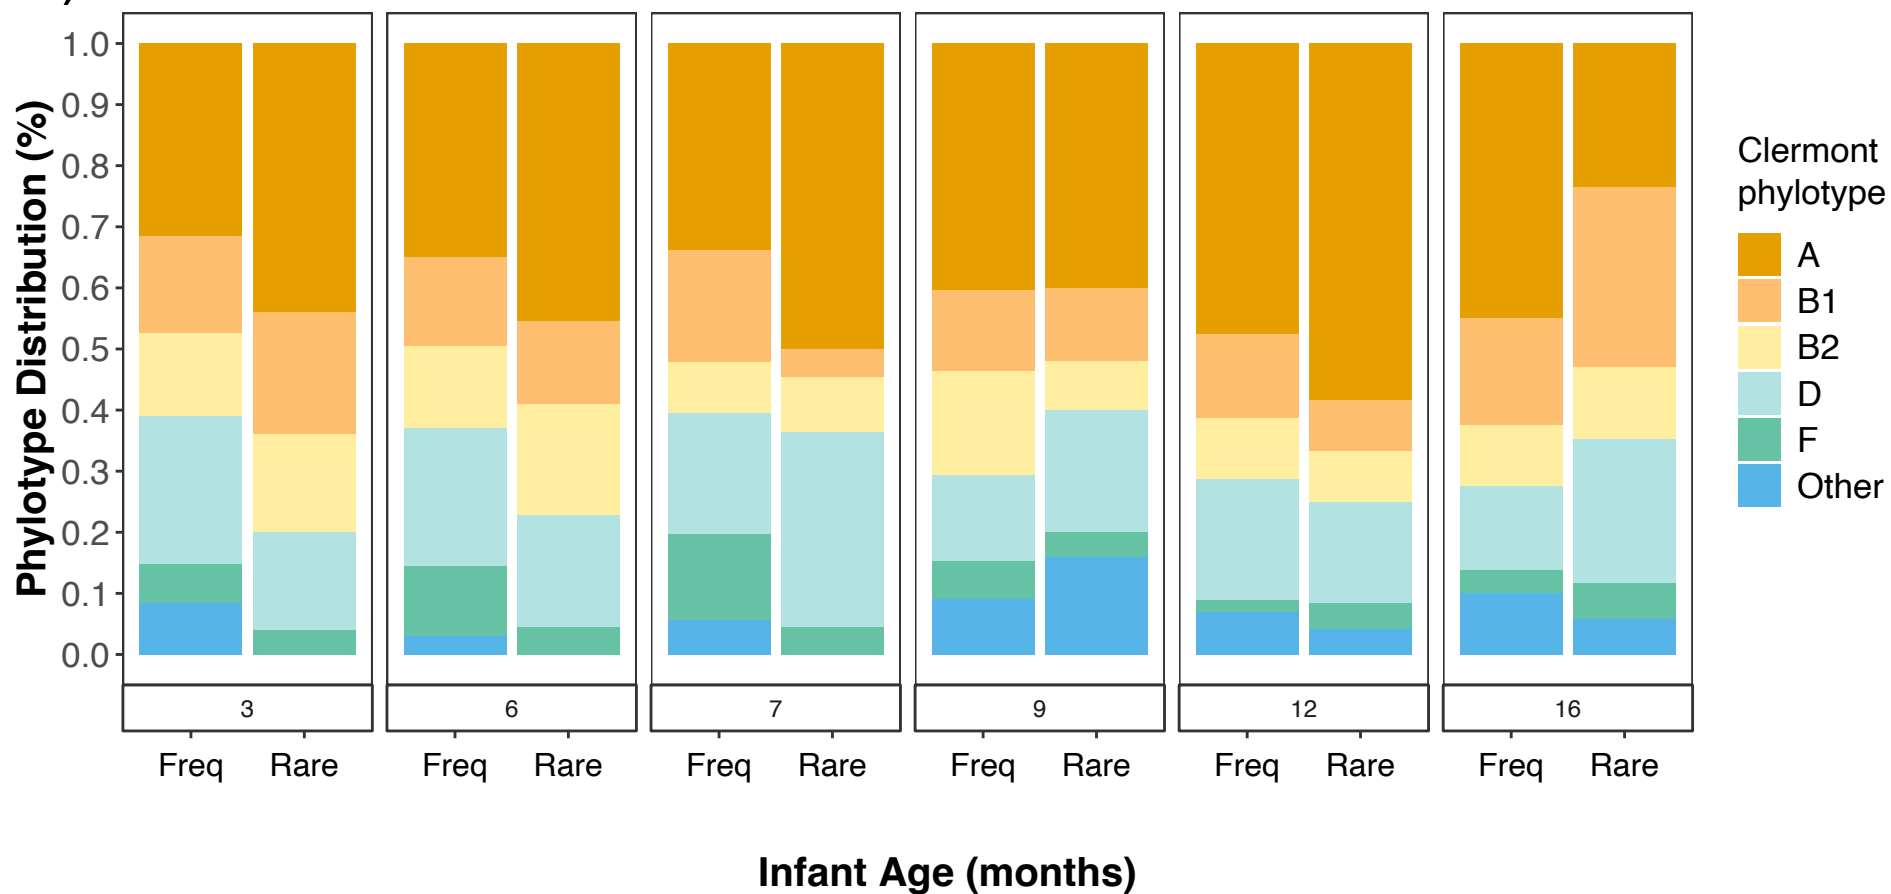

Source: https://medrxiv.org/content/10.1101/2024.11.06.24316595v1.full.pdf
